# Supplementary material
Source: publisher figshare collection journal article supplement (https://tandf.figshare.com/ndownloader/files/12994727)
Supplement: Supplementary file 1 [file 12994727]

**Supplementary 2: Changes in particle size, polydispersity index and zeta potential after storage for 3 months.**

| **Zeta potential (mV)**  **Mean ± S.D.** | | **Mean PDI**  **Mean ± S.D.** | | **Particle size**  **Mean ± S.D.**  **(nm)** | | **NLCs formula code** |
| --- | --- | --- | --- | --- | --- | --- |
| **After storage** | **Before storage** | **After storage** | **Before storage** | **After storage** | **Before storage** |
| -18.9±0.06 | -17.2± 0.53 | 0.39± 0.03 | 0.42± 0.07 | 666.3±14.88 | 683±27.08 | **NLC1** |
| -16.9± 0.30 | -15.1 ±0.22 | 0.28 ± 0.02 | 0.38 ± 0.15 | 302± 10.91 | 307± 18.31 | **NLC2** |
| -14.1±0.15 | -16.6 ±0.14 | 0.41±0.03 | 0.39± 0.11 | 316 ±15.41 | 307 ± 3.68 | **NLC3** |
| -11.02 ±0.30 | -14.6 ±0.78 | 0.73 ± 0.12 | 0.72 ± 0.15 | 319.5±18.98 | 303 ±16.24 | **NLC4** |
| -17.5± 0.38 | -16.2 ±0.15 | 0.49 ± 0.12 | 0.44 ± 0.03 | 889 ± 11.11 | 783.6 ± 7.30 | **NLC5** |
| -13± 0.12 | -13 ± 0.61 | 0.48 ± 0.06 | 0.49 ± 0.02 | 591 ± 27.86 | 563 ±20.33 | **NLC6** |
| -14.4±0.53 | -15.5 ±0.42 | 0.52±0.01 | 0.47 ± 0.03 | 689±25.10 | 616 ± 19.80 | **NLC7** |
| -17.9 ±0.41 | -19.7 ±0.00 | 0.51 ± 0.03 | 0.64 ± 0.11 | 689 ± 14.51 | 698 ± 18.00 | **NLC8** |
